# Supplementary material for: Comparison of energy and nutrient intake with dietary guidance recommendations for older adults in rural communities and its relationship with oxidative stress levels: A latent class analysis study
Source: Research Square preprint supplement (doi:10.21203/rs.3.rs-3939030/v1), 2024-02-12
Supplement: Supplementary file 1 [file a8dab5f7a69bb13ec474550a.docx]

**Supplemental material**

Table 1 Reference intake of energy and major nutrients for the older people in the Dietary guide for elderly adults.1

| Energy and nutrients | RNI a /AI b | | | | | | | |
| --- | --- | --- | --- | --- | --- | --- | --- | --- |
| 65~79 years old | | | | ≥ 80 years old | | | |
|  | Men | | Women | | Men | | Women | |
|  | Light c | | Moderate c | | Light c | | Moderate c | |
| Energy/(kcal/d) | 2050 | 2350 | 1700 | 1950 | 1900 | 2200 | 1500 | 1750 |
| Protein RNI/(g/d) | 20~30 | | | | | | | |
| Fat(%E d) | <10 | | | | | | | |
| Carbohydrate(%E d) | 50~65 | | | | | | | |
| Fiber(g/d) | 25 | | | | | | | |
| Cholesterol(mg/d) | ≤300 | | | | | | | |
| Vitamin A (μg RAE e/d) | 800 | | 700 | | 800 | | 700 | |
| Vitamin B1RNI/(mg/d) | 1.4 | | 1.2 | | 1.4 | | 1.2 | |
| Vitamin B2RNI/(mg/d) | 1.4 | | 1.2 | | 1.4 | | 1.2 | |
| Vitamin C RNI/(mg/d) | 100 | | | | | | | |
| Vitamin E AI/(mgα-TE f/d) | 14 | | | | | | | |
| Calcium RNI/(mg/d) | 1000 | | | | | | | |
| Iron RNI/(mg/d) | 12 | | | | | | | |

Note. RNI a: Recommended intake; AI b: Adequate Intake; c Physical activity level; d %E: Thepercentage of total energy; e Retinol activity equivalent (RAE, μg) =Dietary or supplement source all trans retinol（μg) +1/2 Supplement Pure All Trans β- Carotene（μg)+1/12 Dietary all trans β- Carotene（μg) +1/24 Other Dietary Vitamin A Procarotenoids（μg); fα- Tocopherol equivalent（ α- TE, mg), total in diet α- TE equivalent (mg)=1 ×α- Tocopherol (mg)+0.5 ×β- Tocopherol (mg)+0.1 × γ – tocopherol (mg)+0.2 ×δ- Tocopherol (mg)+0.3 ×α- Triene tocopherol (mg)

Table 2 Nutrients intake grouping of older residents based on reference intake.

| Energy and nutrients | Men | | | | Women | | | |
| --- | --- | --- | --- | --- | --- | --- | --- | --- |
| RNI a /AI b | Nutrients intake c | Occupy RNI%/AI% | Group | RNI a /AI b | Nutrients intake c | Occupy RNI%/AI% | Group |
| Energy/(kcal/d) | 1900 | 1753.79±668.54 | <80,insufficiency  80~110, moderateness  >110, excessiveness | 1  2  3 | 1500 | 1576.83±586.92 | <80,insufficiency  80~110, moderateness  >110, excessiveness | 1  2  3 |
| Protein RNI/(g/d) | 65 | 54.28±27.98 | 55 | 45.78±24.62 |
| Fat(%E d) | 42 | 36.52±3.31 | 33 | 33.14±20.72 |
| Carbohydrate(%E d) | 238 | 224.15±87.39 | 188 | 205.35±76.48 |
| Vitamin A (μg RAE e/d) | 800 | 420.64±198.90 | <80,insufficiency  80~110, moderateness  >110, excessiveness | 1  2  3 | 700 | 439.85±212.56 | <80,insufficiency  80~110, moderateness  >110, excessiveness | 1  2  3 |
| Vitamin C RNI/(mg/d) | 100 | 75.31±40.71 | 100 | 77.32±34.19 |
| Vitamin E AI/(mgα-TE f/d) | 14 | 11.77±8.30 | 14 | 12.62±8.78 |

Note. Note. RNI a: Recommended intake; AI b: Adequate Intake; c Average intake; d %E: Thepercentage of total energy; e Retinol activity equivalent (RAE, μg) =Dietary or supplement source all trans retinol（μg) +1/2 Supplement Pure All Trans β- Carotene（μg)+1/12 Dietary all trans β- Carotene（μg) +1/24 Other Dietary Vitamin A Procarotenoids（μg); fα- Tocopherol equivalent（α- TE, mg), total in diet α- TE equivalent (mg)=1 ×α- Tocopherol (mg)+0.5 ×β- Tocopherol (mg)+0.1 × γ – tocopherol (mg)+0.2 ×δ- Tocopherol (mg)+0.3 ×α- Triene tocopherol (mg); *Cholesterol intake should not be excessive, so only distinguishing between moderateness and excessiveness.

The participants of this study are all individuals with light physical activity

**Reference**

1. China NHaFPCotPsRo. Dietary guide for elderly adults:WS /T－2017. Beijing: Chinese Standard Publishing agency; 2017.
